# Supplementary material
Source: PubMed Central journal article supplement (PMC7054005)
Supplement: NIHMS1551724-supplement-Supplemental_Digital_Content_1.pdf [file NIHMS1551724-supplement-Supplemental_Digital_Content_1.pdf]

## Appendix 1. Directed acyclic graph of proposed relationship between acculturation and adverse pregnancy outcomes.

Proposed (compressed) causal pathway:  
Acculturation and adverse pregnancy outcomes

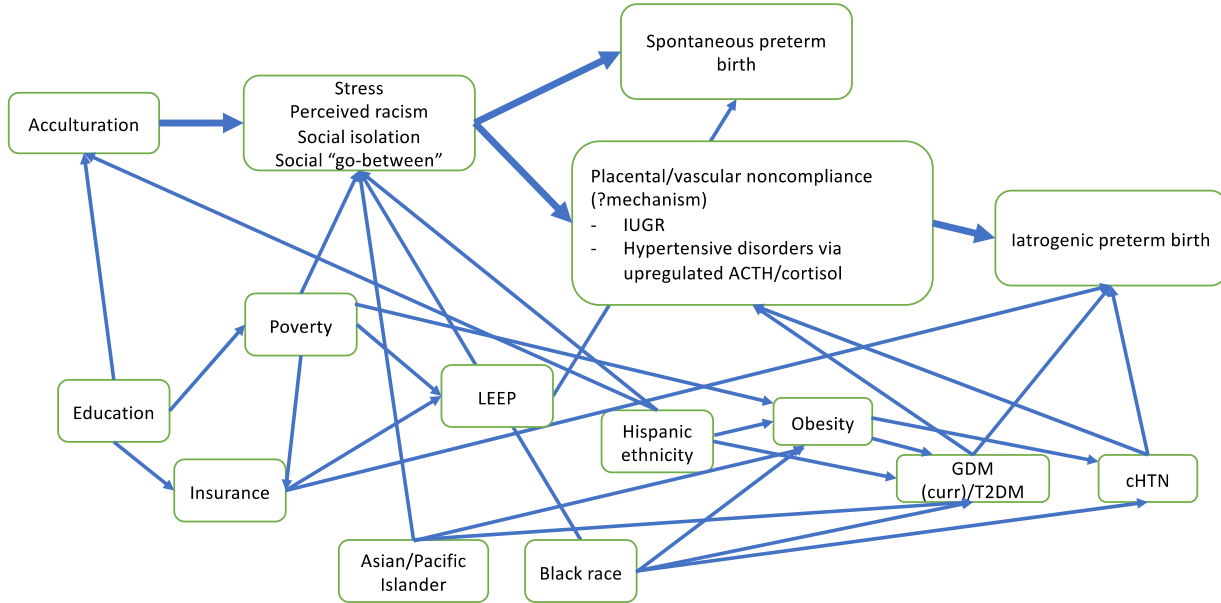

Premkumar A, Debbink MP, Silver RM, Haas DM, Simhan HN, Wing DA, et al. Association of acculturation with adverse pregnancy outcomes. *Obstet Gynecol* 2020;135.

The authors provided this information as a supplement to their article.

©2020 American College of Obstetricians and Gynecologists.

**Appendix 2. Demographics by Acculturation Status When Limited to Women With a Parent Born Outside of the United States<sup>a</sup>**

| <b><u>Demographics</u></b>                                                                                                                                                              | <b><i>More acculturated<sup>b</sup></i></b><br><b><i>(n=1116)</i></b> | <b><i>Less acculturated<sup>c</sup></i></b><br><b><i>(n=1238)</i></b> | <b>p value<sup>d</sup></b> |
|-----------------------------------------------------------------------------------------------------------------------------------------------------------------------------------------|-----------------------------------------------------------------------|-----------------------------------------------------------------------|----------------------------|
| <i>Maternal Age</i>                                                                                                                                                                     |                                                                       |                                                                       |                            |
| 13-21                                                                                                                                                                                   | 287 (25.7)                                                            | 199 (16.1)                                                            | <0.001                     |
| 22-34                                                                                                                                                                                   | 721 (64.6)                                                            | 869 (70.2)                                                            |                            |
| 35-41                                                                                                                                                                                   | 108 (9.7)                                                             | 170 (13.7)                                                            |                            |
| <i>Gravidity</i>                                                                                                                                                                        |                                                                       |                                                                       |                            |
| 1                                                                                                                                                                                       | 801 (71.8)                                                            | 884 (71.4)                                                            | 0.843                      |
| 2 or more                                                                                                                                                                               | 315 (28.2)                                                            | 354 (28.6)                                                            |                            |
| <i>Poverty</i>                                                                                                                                                                          |                                                                       |                                                                       |                            |
| >200% FPL                                                                                                                                                                               | 567 (68.3)                                                            | 644 (67.6)                                                            | 0.894                      |
| 100-200% FPL                                                                                                                                                                            | 118 (14.2)                                                            | 143 (15.0)                                                            |                            |
| <100% FPL                                                                                                                                                                               | 145 (17.5)                                                            | 166 (17.4)                                                            |                            |
| <i>Race or ethnicity</i>                                                                                                                                                                |                                                                       |                                                                       |                            |
| Non-Hispanic white                                                                                                                                                                      | 290 (26.0)                                                            | 265 (21.4)                                                            | 0.004                      |
| Non-Hispanic black                                                                                                                                                                      | 65 (5.8)                                                              | 64 (5.2)                                                              |                            |
| Hispanic                                                                                                                                                                                | 539 (48.3)                                                            | 596 (48.1)                                                            |                            |
| Other                                                                                                                                                                                   | 222 (19.9)                                                            | 313 (25.3)                                                            |                            |
| <i>Education</i>                                                                                                                                                                        |                                                                       |                                                                       |                            |
| Less than high school                                                                                                                                                                   | 90 (8.1)                                                              | 98 (7.9)                                                              | <0.001                     |
| High school graduate                                                                                                                                                                    | 125 (11.2)                                                            | 144 (11.7)                                                            |                            |
| Some college                                                                                                                                                                            | 285 (25.5)                                                            | 227 (18.4)                                                            |                            |
| Technical or Associate's                                                                                                                                                                | 112 (10.0)                                                            | 114 (9.2)                                                             |                            |
| Completed College                                                                                                                                                                       | 271 (24.3)                                                            | 293 (23.7)                                                            |                            |
| Advanced degree work                                                                                                                                                                    | 233 (20.9)                                                            | 360 (29.1)                                                            |                            |
| <i>Insurance</i>                                                                                                                                                                        |                                                                       |                                                                       |                            |
| Government-based                                                                                                                                                                        | 382 (34.4)                                                            | 433 (35.1)                                                            | 0.064                      |
| Military or unspecified                                                                                                                                                                 | 15 (1.4)                                                              | 36 (2.9)                                                              |                            |
| Commercial                                                                                                                                                                              | 539 (48.5)                                                            | 572 (46.3)                                                            |                            |
| Personal or individual                                                                                                                                                                  | 176 (15.8)                                                            | 194 (15.7)                                                            |                            |
| Pregestational diabetes                                                                                                                                                                 | 17 (1.6)                                                              | 7 (0.6)                                                               | 0.024                      |
| Smoking <sup>e</sup>                                                                                                                                                                    | 33 (3.0)                                                              | 13 (1.0)                                                              | 0.001                      |
| Chronic hypertension                                                                                                                                                                    | 22 (2.1)                                                              | 15 (1.3)                                                              | 0.137                      |
| Obesity (Body Mass Index $\geq$ 30 kg per m <sup>2</sup> )                                                                                                                              | 267 (23.9)                                                            | 144 (11.6)                                                            | <0.01                      |
| Abbreviations: FPL – Federal Poverty Level;<br><sup>a</sup> Data presented as n, % by column unless otherwise indicated. Not all columns add to total sample size due to missing values |                                                                       |                                                                       |                            |

Premkumar A, Debbink MP, Silver RM, Haas DM, Simhan HN, Wing DA, et al. Association of acculturation with adverse pregnancy outcomes. *Obstet Gynecol* 2020;135.

The authors provided this information as a supplement to their article.

©2020 American College of Obstetricians and Gynecologists.

<sup>b</sup> Subjects born in the U.S. who reported proficiency in English  
<sup>c</sup> Subjects born or not born in the U.S. who reported limited or poor proficiency in English or preferred study visits conducted in Spanish  
<sup>d</sup>  $\chi^2$  or Fisher's exact tests

**Appendix 3. Adverse Pregnancy Outcomes by Acculturation Status When Limited to Women With a Parent Born Outside of the United States<sup>a</sup>**

| <b><u>Adverse pregnancy outcomes</u></b>                                                                                             | <b><i>More acculturated<sup>b</sup></i></b><br><b>(n=1116)</b> | <b><i>Less acculturated<sup>c</sup></i></b><br><b>(n=1238)</b> | <b>p value<sup>d</sup></b> |
|--------------------------------------------------------------------------------------------------------------------------------------|----------------------------------------------------------------|----------------------------------------------------------------|----------------------------|
| <i>All preterm birth (PTB)</i>                                                                                                       |                                                                |                                                                |                            |
| Yes                                                                                                                                  | 90 (8.1)                                                       | 77 (6.2)                                                       | 0.082                      |
| No                                                                                                                                   | 1026 (91.9)                                                    | 1161 (93.8)                                                    |                            |
| <i>Spontaneous PTB</i>                                                                                                               |                                                                |                                                                |                            |
| Yes                                                                                                                                  | 59 (5.3)                                                       | 47 (3.8)                                                       | 0.082                      |
| No                                                                                                                                   | 1057 (94.7)                                                    | 1191 (96.2)                                                    |                            |
| <i>Indicated PTB</i>                                                                                                                 |                                                                |                                                                |                            |
| Yes                                                                                                                                  | 31 (2.8)                                                       | 30 (2.4)                                                       | 0.589                      |
| No                                                                                                                                   | 1085 (97.2)                                                    | 1208 (97.6)                                                    |                            |
| <i>Preeclampsia or eclampsia</i>                                                                                                     |                                                                |                                                                |                            |
| Yes                                                                                                                                  | 101 (9.0)                                                      | 78 (6.3)                                                       | 0.012                      |
| No                                                                                                                                   | 1015 (91.0)                                                    | 1160 (93.7)                                                    |                            |
| <i>Preeclampsia with severe features or eclampsia</i>                                                                                |                                                                |                                                                |                            |
| Yes                                                                                                                                  | 52 (4.7)                                                       | 36 (2.9)                                                       | 0.025                      |
| No                                                                                                                                   | 1064 (95.3)                                                    | 1202 (97.1)                                                    |                            |
| <i>Preeclampsia without severe features</i>                                                                                          |                                                                |                                                                |                            |
| Yes                                                                                                                                  | 49 (4.4)                                                       | 42 (3.4)                                                       | 0.210                      |
| No                                                                                                                                   | 1067 (95.6)                                                    | 1196 (96.6)                                                    |                            |
| <i>Gestational hypertension</i>                                                                                                      |                                                                |                                                                |                            |
| Yes                                                                                                                                  | 127 (11.6)                                                     | 91 (7.4)                                                       | 0.001                      |
| No                                                                                                                                   | 967 (88.4)                                                     | 1132 (92.6)                                                    |                            |
| <i>Stillbirth</i>                                                                                                                    |                                                                |                                                                |                            |
| Yes                                                                                                                                  | 8 (0.7)                                                        | 5 (0.4)                                                        | 0.406                      |
| No                                                                                                                                   | 1108 (99.3)                                                    | 1233 (99.6)                                                    |                            |
| <i>Gestational diabetes<sup>e</sup></i>                                                                                              |                                                                |                                                                |                            |
| Yes                                                                                                                                  | 48 (4.3)                                                       | 82 (6.6)                                                       | 0.014                      |
| No <sup>e</sup>                                                                                                                      | 1068 (95.7)                                                    | 1588 (93.4)                                                    |                            |
| <i>Small for gestational age</i>                                                                                                     |                                                                |                                                                |                            |
| Yes                                                                                                                                  | 112 (10.0)                                                     | 129 (10.4)                                                     | 0.759                      |
| No                                                                                                                                   | 1004 (90.0)                                                    | 1109 (89.6)                                                    |                            |
| <i>Large for gestational age</i>                                                                                                     |                                                                |                                                                |                            |
| Yes                                                                                                                                  | 79 (7.1)                                                       | 87 (6.8)                                                       | 0.819                      |
| No                                                                                                                                   | 1037 (92.9)                                                    | 1185 (93.2)                                                    |                            |
| Abbreviations: PTB = preterm birth                                                                                                   |                                                                |                                                                |                            |
| <sup>a</sup> Data presented as n, % by column unless otherwise noted. Not all columns add to total sample size due to missing values |                                                                |                                                                |                            |

Premkumar A, Debbink MP, Silver RM, Haas DM, Simhan HN, Wing DA, et al. Association of acculturation with adverse pregnancy outcomes. *Obstet Gynecol* 2020;135.

The authors provided this information as a supplement to their article.

©2020 American College of Obstetricians and Gynecologists.

- <sup>b</sup> Subjects born in the U.S. who reported proficiency in English
- <sup>c</sup> Subjects born or not born in the U.S. who reported limited or poor proficiency in English or preferred study visits conducted in Spanish
- <sup>d</sup>  $\chi^2$  or Fisher's exact tests
- <sup>e</sup> Excluding women with pre-gestational diabetes

Premkumar A, Debbink MP, Silver RM, Haas DM, Simhan HN, Wing DA, et al. Association of acculturation with adverse pregnancy outcomes. *Obstet Gynecol* 2020;135.

The authors provided this information as a supplement to their article.

©2020 American College of Obstetricians and Gynecologists.

**Appendix 4. Association Between Acculturation and Adverse Pregnancy Outcomes when Limited to Women with a Parent Born Outside of the United States**

| <b>Outcome</b>                                                                               | <b>OR</b> | <b>95% CI</b> | <b>aOR<sup>a</sup></b> | <b>95% CI</b> |
|----------------------------------------------------------------------------------------------|-----------|---------------|------------------------|---------------|
| All preterm birth (PTB)                                                                      | 1.32      | 0.96-1.81     | 1.58                   | 1.06-2.35     |
| Spontaneous PTB                                                                              | 1.41      | 0.96-2.09     | 1.61                   | 0.99-2.63     |
| Indicated PTB                                                                                | 1.15      | 0.69-1.91     | 1.40                   | 0.73-2.69     |
| Preeclampsia or eclampsia                                                                    | 1.47      | 1.09-2.01     | 1.49                   | 1.02-2.16     |
| Preeclampsia with severe features or eclampsia                                               | 1.63      | 1.05-2.51     | 1.64                   | 0.96-2.78     |
| Preeclampsia without severe features                                                         | 1.30      | 0.85-1.99     | 1.33                   | 0.80-2.22     |
| Gestational hypertension <sup>b</sup>                                                        | 1.63      | 1.23-2.17     | 1.65                   | 1.19-2.28     |
| Stillbirth                                                                                   | 1.78      | 0.58-5.46     | 0.82                   | 0.21-3.15     |
| Gestational diabetes <sup>c</sup>                                                            | 0.63      | 0.44-0.92     | 0.76                   | 0.50-1.17     |
| Small for gestational age                                                                    | 0.96      | 0.73-1.25     | 0.99                   | 0.72-1.38     |
| Large for gestational age                                                                    | 1.04      | 0.76-1.42     | 1.08                   | 0.76-1.56     |
| Abbreviations: PTB = preterm birth                                                           |           |               |                        |               |
| <sup>a</sup> Adjusting for age, gravidity, poverty, race/ethnicity, education, and insurance |           |               |                        |               |
| <sup>b</sup> Excluding women with chronic hypertension                                       |           |               |                        |               |
| <sup>c</sup> Excluding women with pre-gestational diabetes                                   |           |               |                        |               |

Premkumar A, Debbink MP, Silver RM, Haas DM, Simhan HN, Wing DA, et al. Association of acculturation with adverse pregnancy outcomes. *Obstet Gynecol* 2020;135.

The authors provided this information as a supplement to their article.

©2020 American College of Obstetricians and Gynecologists.
